# Supplementary material
Source: PubMed Central journal article supplement (PMC395899)
Supplement: pnas_101_16_5922__1.pdf [file pnas_101_16_5922__1.pdf]

**CFCS**    **CP**    **EHP**    **linker**

```

BAB72021 1044 R K R R - G I S N E T T - - - A E A H T V I G P I F I A T N A S K G E P R V D L F P E D V P E S L S A V N P I S L G D N E T D N G I P Q E
P07911    586 R F R S - - G S V I D - - - - Q S R V L N L G P I T R K G - - - - - - - - - - - - - - - V Q A T - - V S R
P55259    471 Q V R S - E V P A I D - - - - L A R V L D L G P I T R R G - - - - - - - - - - - - - - - A Q S P G V M N G
CAB63941 2394 R S K R - D V G S Y Q - - - - E K V D V V L G P I Q L Q T - - - - - - - - - - - - - - - - - P P R R E E
AAC24898  518 R R K R - D I P S Y K - - - - W K T D S V I G P I R L K R D R S A S - - - - - - - - - - - R D S G L L P Q I H E A
Q03167    732 Q N K K - T F T K P L A V I H H E A E S K E K G P S M K E P N P - - - - - - - - - - - - - - - - - I S P P I F H G
NP_005413 2081 R R K R L D W C E D N G G C E Q I C T S R V D G P L C S C V T G - - - - - - - - - - - - - - - T L Q E D G K S C R
AAL12829  282 K R K R - L L R D Q T - - - - - - - - - - - G G V L V V E L S L R S - - - - - - - - - - - - - - - - - R G
AAL86587  516 R V R R - E V G E D E D S A G L Q S Q T L T G G P I A I D W E D *

```

```

BAB72021 1109 P R S V K S R L H V W I P I L A A V L V A S L L S F A F V V S - - F V C K S K Y G D R D L L V P K S S V N C S I - - - - -
P07911    616 A F S S L G L L K V W L P L L S A T L T - L T F Q - - - - - F V C K S K Y G D R D L L V P K S S V N C S I - - - - -
P55259    504 T P S T A G F L V A W P M V L L T V L L A - W L F - - - - - F V C K S K Y G D R D L L V P K S S V N C S I - - - - -
CAB63941 2424 E P R *
AAC24898  559 E I S N Q P L S R L Y L F S F M V L A L N - V V I V A I T T V - - K H F L N R W M D H R Y Q K L Q V Y - - - - -
Q03167    771 L D T L T V M G I A F A A F V I G A L L T G A L W Y I Y S H T G E T A G R Q Q V P T S P P A S E N S S A A H S I G S T Q S T P C S S S S T A
NP_005413 2123 A S N S S M E L Q V W T L L L I M I Q I S - L W H F V Y K S G - - T T S - - - - -
AAL12829  306 F S S L Y S F S D V L H H L I M M L G I C A V L - - - - -
AAL86587

```

**TMD**    **cytoplasmic tail**
