# Supplementary material
Source: PubMed Central journal article supplement (PMC395899)

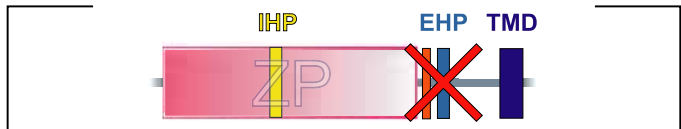

with TMD

secreted

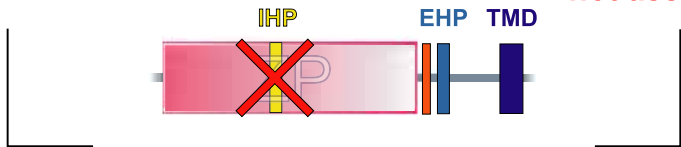

not assembled

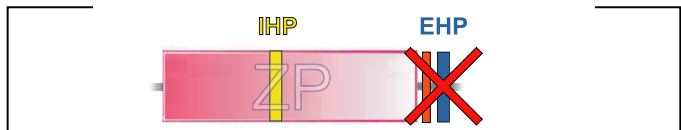

not secreted

without TMD

(not assembled)

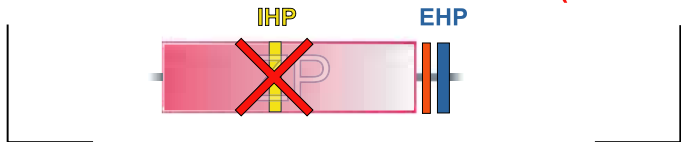

Supplement: pnas_101_16_5922__2.pdf [file pnas_101_16_5922__2.pdf]
